# Supplementary material
Source: MDPI journal article supplement (https://www.mdpi.com/2073-4344/13/2/371)
Supplement: s1 [file s1]

## Catalysts

**Highly efficient biosynthesis of nicotinic acid by immobilized whole cells of *E. coli* expressing nitrilase in semi-continuous packed-bed bioreactor**

Xuejiao Liu<sup>1</sup>, Baodi Ma<sup>1</sup>, Xiaomei Wu<sup>1</sup>, Yi Xu<sup>1\*</sup>

*<sup>1</sup>School of Chemical and Environmental Engineering, Shanghai Institute of Technology,  
100 Haiquan Road, Shanghai 201418, China*

To whom correspondence should be addressed:

Yi Xu: [xuyi@sit.edu.cn](mailto:xuyi@sit.edu.cn)

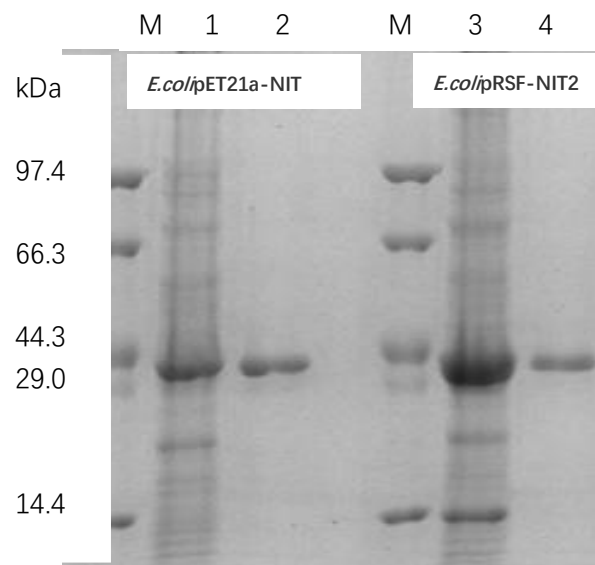

**Figure S1.** SDS-PAGE of recombinant NIT from *E. coli* pET21a-AfNit and *E. coli* pRSF-AfNit2. M: protein marker; 1: supernatant of *E. coli* pET21a-AfNit cell free extract; 2: purified NIT from *E. coli* pET21a-AfNit; 3: supernatant of *E. coli* pRSF-AfNit2 cell free extract; 4: purified NIT from *E. coli* pRSF-AfNit2.

**a**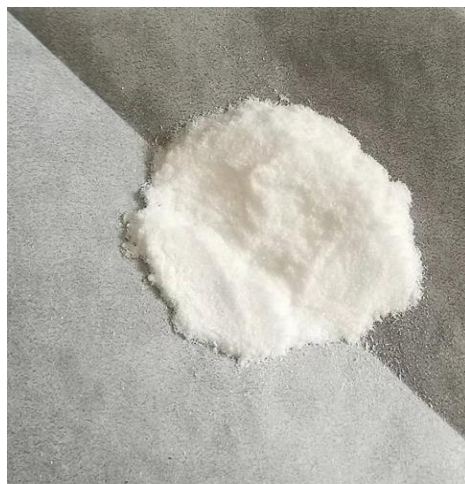**b**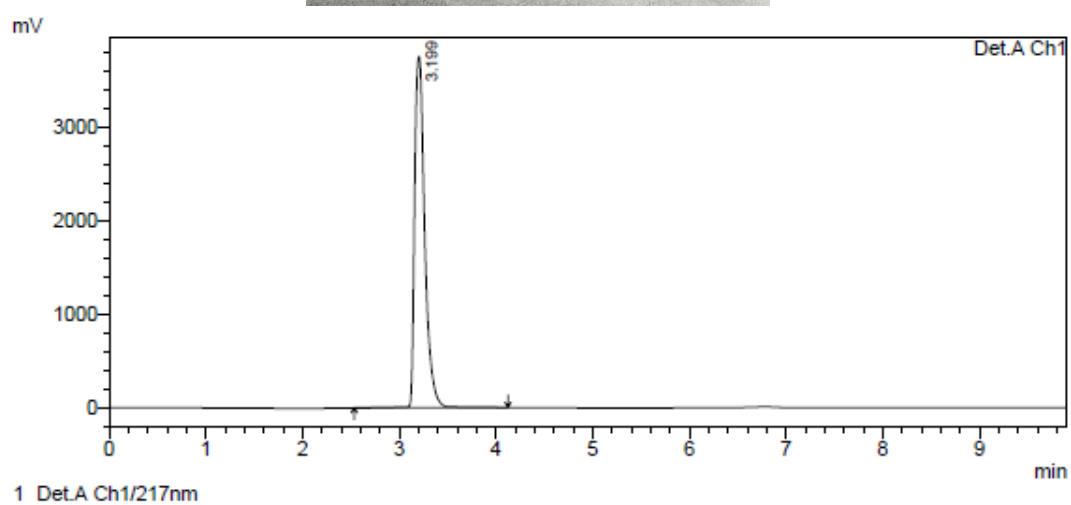**c**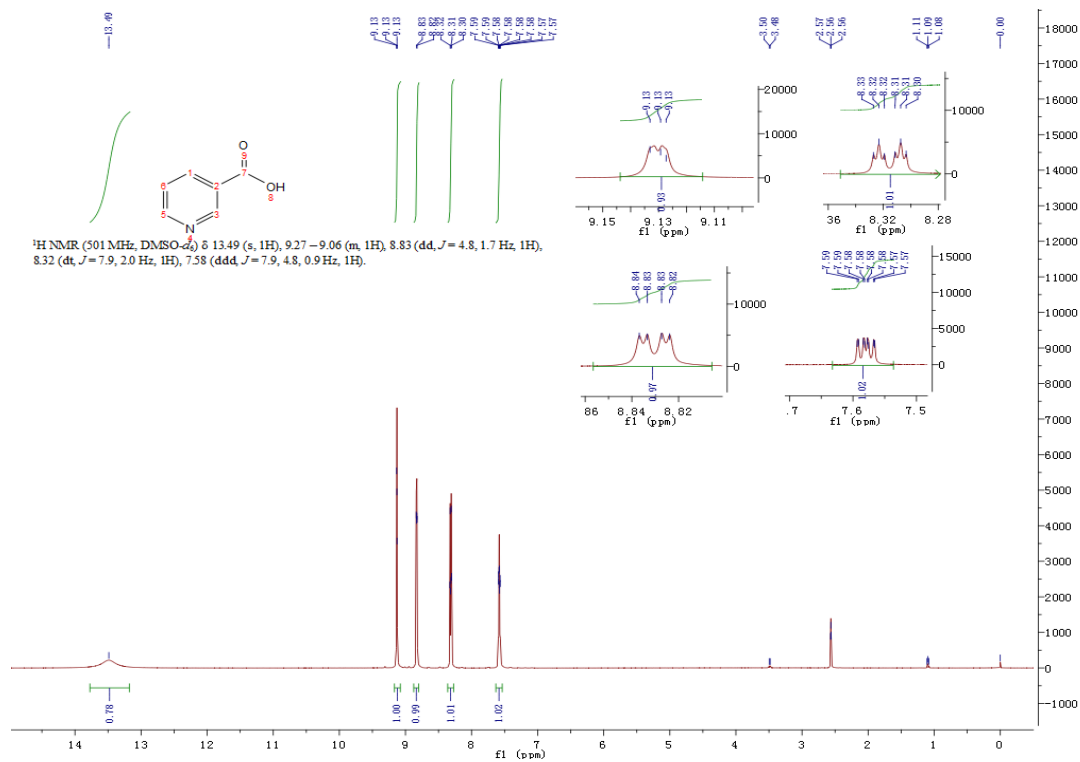

**d**

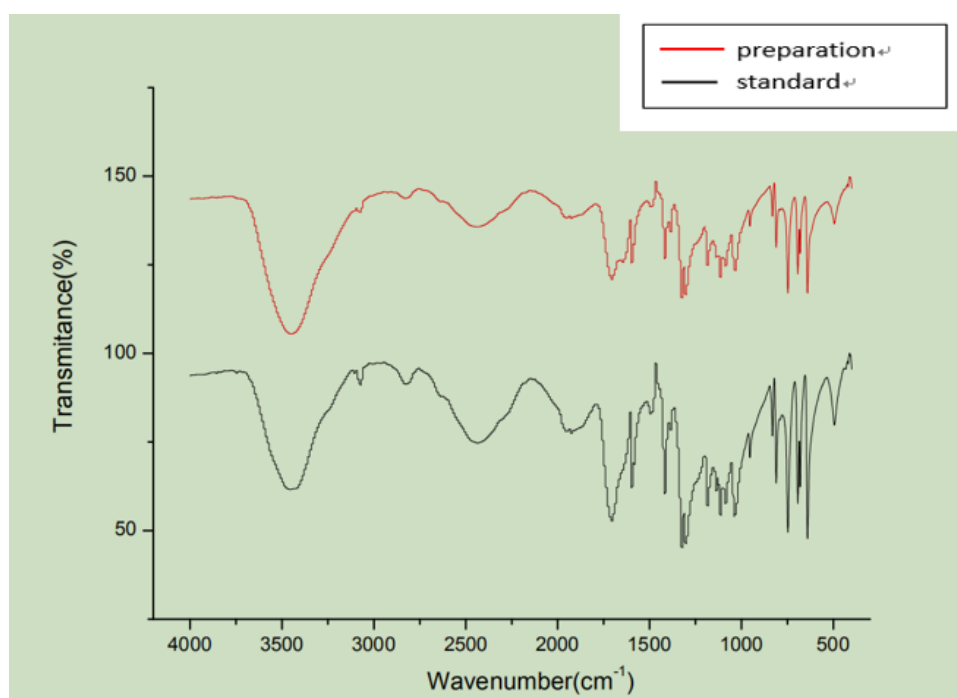

**Figure S2.** Characterization spectrum and picture of prepared nicotinic acid. (a) The morphology of crystallized NA; (b) HPLC spectrum; (c)  $^1\text{H}$  NMR spectrum ; (d) Fourier transform infrared spectroscopy.
